# Supplementary material for: Visualized in-sensor computing
Source: PubMed Central journal article supplement (PMC11043433; doi:10.1038/s41467-024-47630-9), 2024-04-24
Supplement: 41467_2024_47630_MOESM3_ESM.pdf [file 41467_2024_47630_MOESM3_ESM.pdf]

## **Description of Additional Supplementary Files**

File Name: **Supplementary Movie 1**

Description: Under electric spikes, chromaticity outputs via ENT representing the International Morse code of letters "A".

File Name: **Supplementary Movie 2**

Description: Under electric spikes, chromaticity outputs via ENT representing the International Morse code of letters "B".
